# Supplementary material for: Neuronavigated Cerebellar 50 Hz tACS: Attenuation of Stimulation Effects by Motor Sequence Learning
Source: MDPI journal article supplement (doi:10.3390/biomedicines11082218), 2023-08-08
Supplement: s1 [file s1]

**Supplementary Table S1.** Mean stimulator output to evoke an MEP of 1 mV  $\pm$  SEM

|                          | s-tACS <sub>Rest</sub> | s-tACS <sub>MSL</sub> | l-tACS <sub>Rest</sub> | l-tACS <sub>MSL</sub> |
|--------------------------|------------------------|-----------------------|------------------------|-----------------------|
| stimulator output (in %) | 51.15 $\pm$ 2.66       | 50.85 $\pm$ 2.33      | 50.55 $\pm$ 2.54       | 51.6 $\pm$ 2.65       |

**Supplementary Table S2.** Descriptive data regarding AMT, mean  $\pm$  SEM

|               | s-tACS <sub>Rest</sub> | s-tACS <sub>MSL</sub> | l-tACS <sub>Rest</sub> | l-tACS <sub>MSL</sub> |
|---------------|------------------------|-----------------------|------------------------|-----------------------|
| pre (in %)    | 42.20 $\pm$ 1.04       | 44.40 $\pm$ 1.46      | 42.75 $\pm$ 1.37       | 42.95 $\pm$ 1.14      |
| post 1 (in %) | 41.70 $\pm$ 1.00       | 43.60 $\pm$ 1.54      | 42.80 $\pm$ 1.36       | 42.25 $\pm$ 1.15      |
| post 2 (in %) | 42.00 $\pm$ 1.00       | 44.00 $\pm$ 1.52      | 42.10 $\pm$ 1.31       | 41.20 $\pm$ 1.25      |

**Supplementary Table S3.** Descriptive data regarding RMT, mean  $\pm$  SEM

|               | s-tACS <sub>Rest</sub> | s-tACS <sub>MSL</sub> | l-tACS <sub>Rest</sub> | l-tACS <sub>MSL</sub> |
|---------------|------------------------|-----------------------|------------------------|-----------------------|
| pre (in %)    | 49.53 $\pm$ 2.35       | 48.25 $\pm$ 2.22      | 49.19 $\pm$ 1.92       | 47.59 $\pm$ 1.94      |
| post 1 (in %) | 48.82 $\pm$ 2.18       | 48.88 $\pm$ 2.41      | 49.44 $\pm$ 2.17       | 48.12 $\pm$ 2.00      |

**Supplementary Table S4.** Descriptive electric field magnitude, bias and spatial extent with respect to nine lateralized cerebellar ROIs. Means  $\pm$  standard deviations are shown for the left (L) and right (R) cerebellar hemisphere, respectively.

| ROI     | Hemisphere | E  <sub>target</sub> [V/m] | E  <sub>bias</sub> [mm] | E  <sub>extent</sub> [mm] |
|---------|------------|----------------------------|-------------------------|---------------------------|
| III     | L          | 0.09 $\pm$ 0.008           | 27 $\pm$ 5.4            | 35 $\pm$ 1.5              |
|         | R          | 0.07 $\pm$ 0.008           | 25 $\pm$ 4.6            | 33 $\pm$ 1.4              |
| IV/V    | L          | 0.08 $\pm$ 0.009           | 33 $\pm$ 5.6            | 37 $\pm$ 1.4              |
|         | R          | 0.09 $\pm$ 0.008           | 26 $\pm$ 4              | 33 $\pm$ 1.2              |
| VI      | L          | 0.09 $\pm$ 0.011           | 33 $\pm$ 6.8            | 39 $\pm$ 1.4              |
|         | R          | 0.1 $\pm$ 0.01             | 24 $\pm$ 2.6            | 34 $\pm$ 0.6              |
| Crus I  | L          | 0.08 $\pm$ 0.013           | 38 $\pm$ 5.8            | 43 $\pm$ 1.5              |
|         | R          | 0.11 $\pm$ 0.013           | 24 $\pm$ 4.4            | 36 $\pm$ 0.8              |
| Crus II | L          | 0.09 $\pm$ 0.017           | 33 $\pm$ 5.4            | 42 $\pm$ 1.5              |
|         | R          | 0.11 $\pm$ 0.017           | 20 $\pm$ 5.1            | 36 $\pm$ 1                |
| VIIb    | L          | 0.1 $\pm$ 0.018            | 33 $\pm$ 3.3            | 42 $\pm$ 1.2              |
|         | R          | 0.12 $\pm$ 0.016           | 22 $\pm$ 7.4            | 37 $\pm$ 1.2              |
| VIII    | L          | 0.11 $\pm$ 0.014           | 26 $\pm$ 2              | 40 $\pm$ 1                |
|         | R          | 0.12 $\pm$ 0.01            | 18 $\pm$ 6              | 36 $\pm$ 1.4              |
| IX      | L          | 0.12 $\pm$ 0.008           | 16 $\pm$ 3.3            | 36 $\pm$ 1                |
|         | R          | 0.13 $\pm$ 0.009           | 12 $\pm$ 4.1            | 35 $\pm$ 1.2              |
| X       | L          | 0.07 $\pm$ 0.008           | 27 $\pm$ 1.9            | 39 $\pm$ 0.8              |
|         | R          | 0.09 $\pm$ 0.011           | 21 $\pm$ 7.6            | 35 $\pm$ 1.4              |

**Supplementary Table S5.** Follow-up *t*-tests assessing electric field magnitude and bias differences across cerebellar ROIs in the right (R) hemisphere. *T*-value, *p*-value and Cohens *d* is depicted for every pairwise *t*-tests. Asterisks indicate significant results (Bonferroni-corrected).

| Test conditions (R) | E  <sub>target</sub>   |          |          | E  <sub>bias</sub>     |          |          |
|---------------------|------------------------|----------|----------|------------------------|----------|----------|
|                     | <i>t</i> <sub>19</sub> | <i>p</i> | <i>d</i> | <i>t</i> <sub>19</sub> | <i>p</i> | <i>d</i> |
| Crus I VS Crus II   | -2.4                   | > .9     | 0.54     | 3.4                    | .108     | 0.76     |
| Crus I VS III       | 8.7*                   | < .001   | 2        | -0.62                  | > .9     | 0.14     |
| Crus I VS IV/V      | 7.6*                   | < .001   | 1.7      | -1.03                  | > .9     | 0.23     |
| Crus I VS VI        | 3.4                    | .104     | 0.76     | 0.59                   | > .9     | 0.13     |
| Crus I VS VIIb      | -4.7*                  | .005     | 1.06     | 1.31                   | > .9     | 0.29     |
| Crus I VS VIII      | -7.2*                  | < .001   | 1.61     | 4.07*                  | .024     | 0.91     |
| Crus I VS IX        | -9.3*                  | < .001   | 2.08     | 9.41*                  | < .001   | 2.11     |
| Crus I VS X         | 8.5*                   | < .001   | 1.9      | 1.88                   | > .9     | 0.42     |
| Crus II VS III      | 8.2*                   | < .001   | 1.82     | -2.54                  | .725     | 0.57     |
| Crus II VS IV/V     | 7*                     | < .001   | 1.56     | -3.08                  | 0.222    | 0.7      |
| Crus II VS VI       | 4.4*                   | .012     | 0.98     | -2.57                  | 0.67     | 0.58     |
| Crus II VS VIIb     | -7.7*                  | < .001   | 1.71     | -1.9                   | > .9     | 0.43     |
| Crus II VS VIII     | -4.9*                  | .004     | 1.08     | 2.2                    | > .9     | 0.49     |
| Crus II VS IX       | -5.6*                  | .001     | 1.26     | 5.29*                  | .002     | 1.18     |
| Crus II VS X        | 7.3*                   | < .001   | 1.63     | -0.19                  | > .9     | 0.04     |
| III VS IV/V         | -6.1*                  | < .001   | 1.36     | -0.81                  | > .9     | 0.18     |
| III VS VI           | -9.8*                  | < .001   | 2.18     | 1.34                   | > .9     | 0.3      |
| III VS VIIb         | -10.8*                 | < .001   | 2.42     | 1.35                   | > .9     | 0.3      |
| III VS VIII         | -19.3*                 | < .001   | 4.33     | 3.97*                  | .03      | 0.89     |
| III VS IX           | -29.6*                 | < .001   | 6.62     | 12.04*                 | < .001   | 2.69     |
| III VS X            | -0.3                   | > .9     | 0.06     | 3.1                    | .213     | 0.69     |
| IV/V VS VI          | -10*                   | < .001   | 2.23     | 2.18                   | > .9     | 0.49     |
| IV/V VS VIIb        | -10*                   | < .001   | 2.17     | 1.7                    | > .9     | 0.38     |
| IV/V VS VIII        | -17.6*                 | < .001   | 4        | 4.55*                  | .008     | 1.02     |
| IV/V VS IX          | -27.3*                 | < .001   | 6.1      | 13.17*                 | < .001   | 2.94     |
| IV/V VS X           | 3.4                    | .117     | 0.75     | 3.48                   | .089     | 0.78     |
| VI VS VIIb          | -7.4*                  | < .001   | 1.65     | 0.91                   | > .9     | 0.2      |
| VI VS VIII          | -13.2*                 | < .001   | 2.95     | 3.79*                  | .045     | 0.85     |
| VI VS IX            | -16*                   | < .001   | 3.58     | 11.3*                  | < .001   | 2.53     |
| VI VS X             | 8.1*                   | < .001   | 1.81     | 1.81                   | > .9     | 0.4      |
| VIIb VS VIII        | -1.6                   | > .9     | 0.35     | 4.37*                  | .012     | 0.98     |
| VIIb VS IX          | -2.7                   | .474     | 0.61     | 5.4*                   | .001     | 1.21     |
| VIIb VS X           | 9.3*                   | < .001   | 2.07     | 0.46                   | > .9     | 0.1      |
| VIII VS IX          | -3                     | .289     | 0.66     | 4.49*                  | .009     | 1        |
| VIII VS X           | 15*                    | < .001   | 3.36     | -1.59                  | > .9     | 0.36     |
| IX VS X             | 19.2*                  | < .001   | 4.28     | -6.43*                 | < .001   | 1.44     |

**Supplementary Table S6.** Descriptive electric field magnitudes for non-lateralized cerebellar vermis regions. Means ± standard deviations are shown, according to ROIs of the AAL atlas.

|             | E  <sub>target</sub> [V/m] |
|-------------|----------------------------|
| Vermis I/II | 0.07 ± 0.013               |
| Vermis III  | 0.07 ± 0.008               |
| Vermis IV/V | 0.1 ± 0.01                 |
| Vermis VI   | 0.11 ± 0.014               |
| Vermis VII  | 0.12 ± 0.018               |
| Vermis VIII | 0.12 ± 0.017               |
| Vermis IX   | 0.13 ± 0.013               |
| Vermis X    | 0.11 ± 0.013               |
