# Supplementary material for: Neuronavigated Cerebellar 50 Hz tACS: Attenuation of Stimulation Effects by Motor Sequence Learning
Source: MDPI journal article supplement (doi:10.3390/biomedicines11082218), 2023-08-08
Supplement: s1 [file s1]

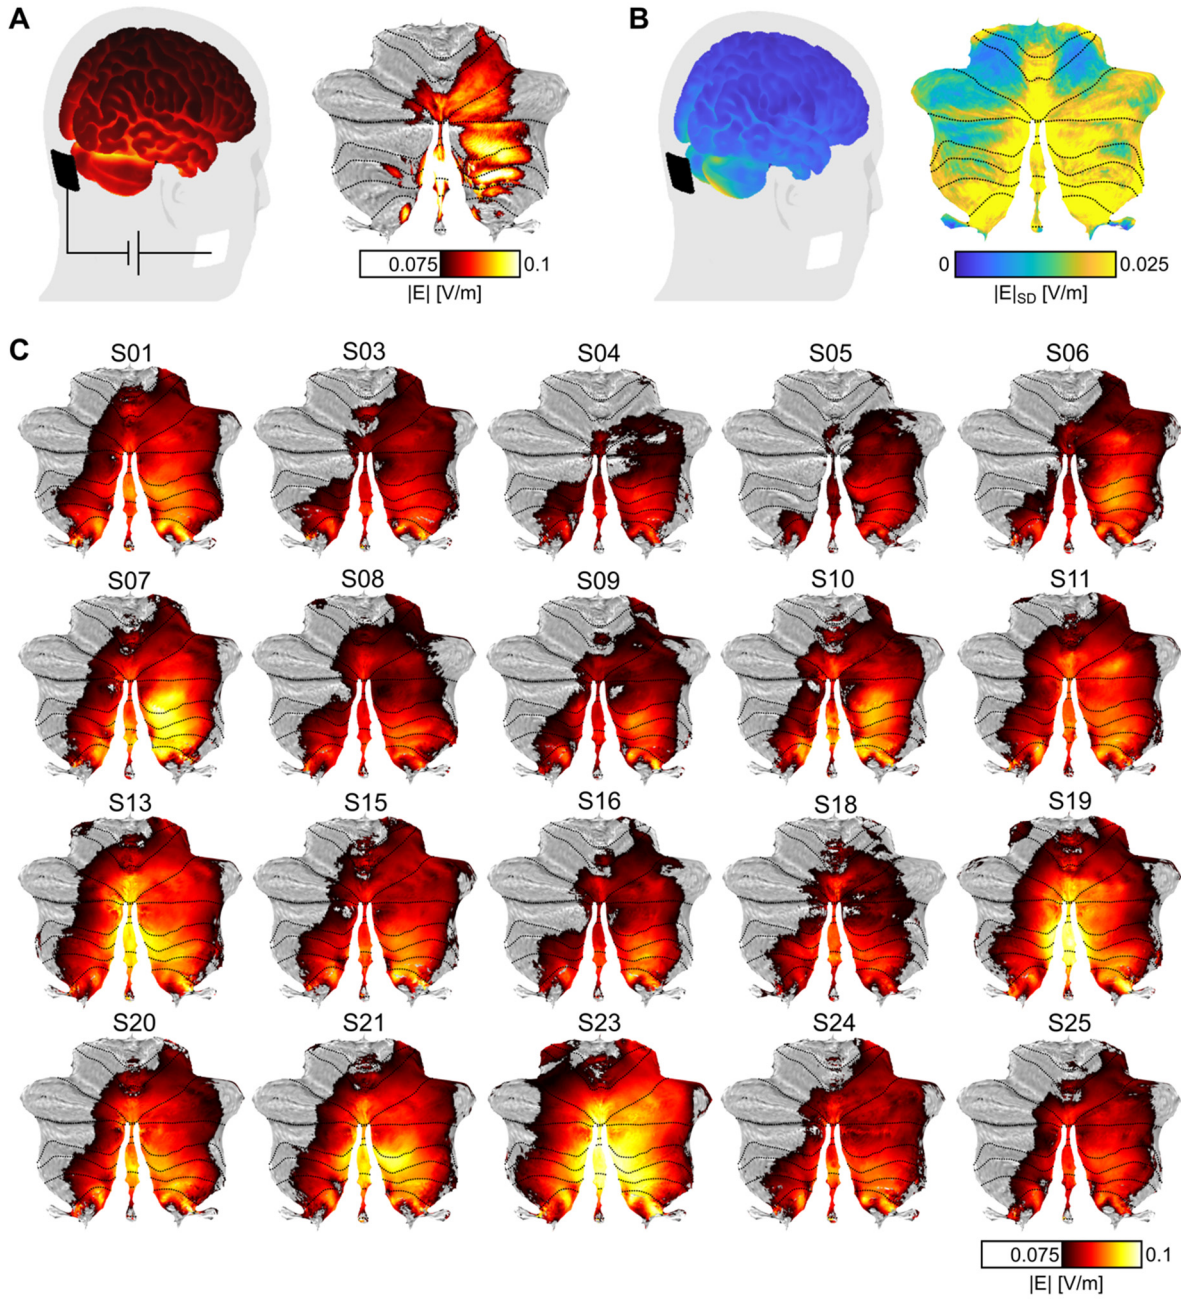

**Figure S1.** Individual electric field magnitudes in the cerebellum. Average (A) and standard deviation (SD) (B) of electric field magnitude for the complete sample were interpolated on cortical and cerebellar surfaces of the ICBM152, as well as on a cerebellar flatmap. (C) Individual electric fields were interpolated on a cerebellar flatmap. The variability across subjects mainly affects the extent of the electric field to the not targeted left hemisphere and the overall intensity.
